# Supplementary material for: A novel nanocomposite drug delivery system for SARS-CoV-2 infections
Source: Royal Society of Chemistry journal article supplement (doi:10.1039/d4na00361f), 2024-01-01
Supplement: d4na00361f1.pdf [file d4na00361f1.pdf]

### Supplementary Information

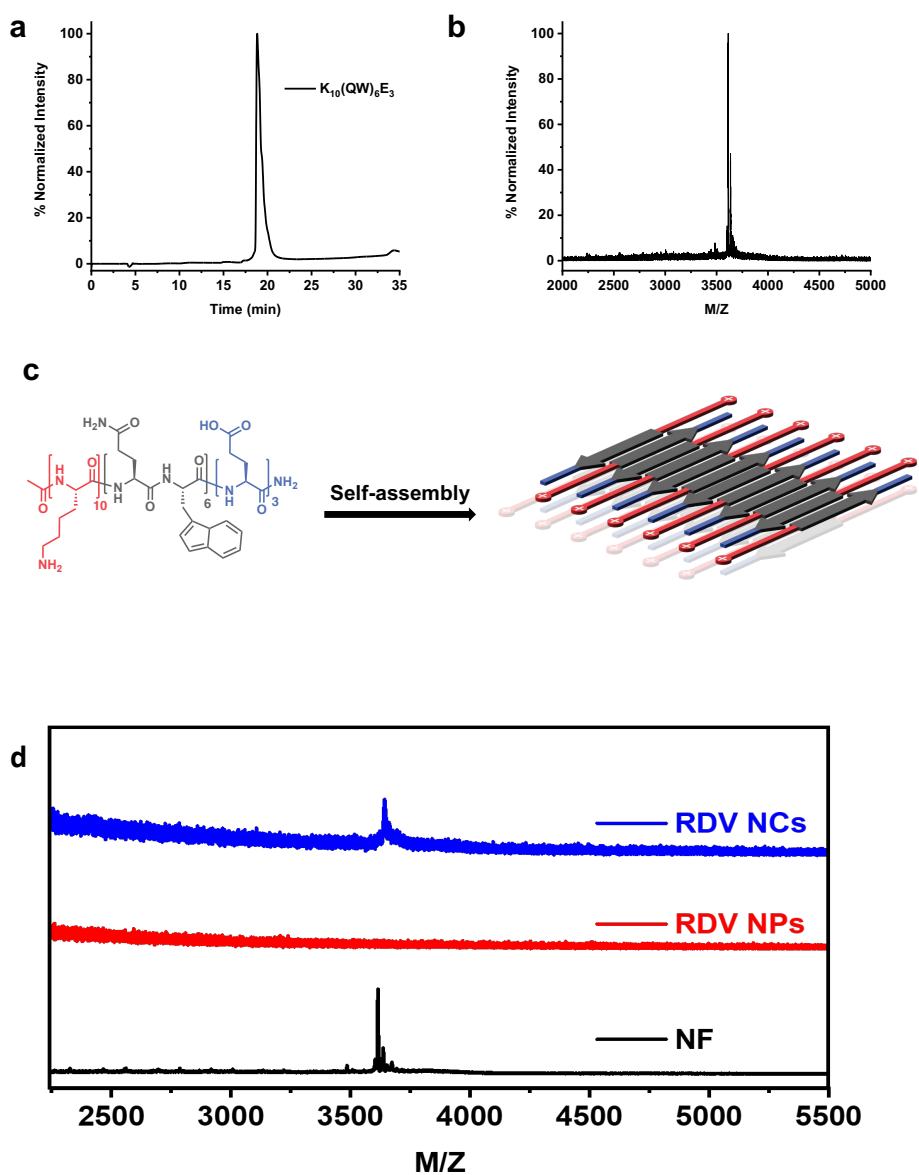

**Figure S1.** (a) The HPLC chromatogram and (b) MALDI spectra of the peptide (calculated mass: 3614.22; experimental mass: 3614.36), demonstrate the successful synthesis. (c) A schematic representation illustrates the self-assembly of the peptide into a sandwich-like  $\beta$ -sheet structure, forming nanofibers (NF). (d) Stacked MALDI spectra of the NF (calculated mass: 3614.22; experimental mass: 3614.36), MALDI spectra of RDV-NPs showing the absence of NF, and MALDI spectra of RDV-NCs showing the presence of NF.

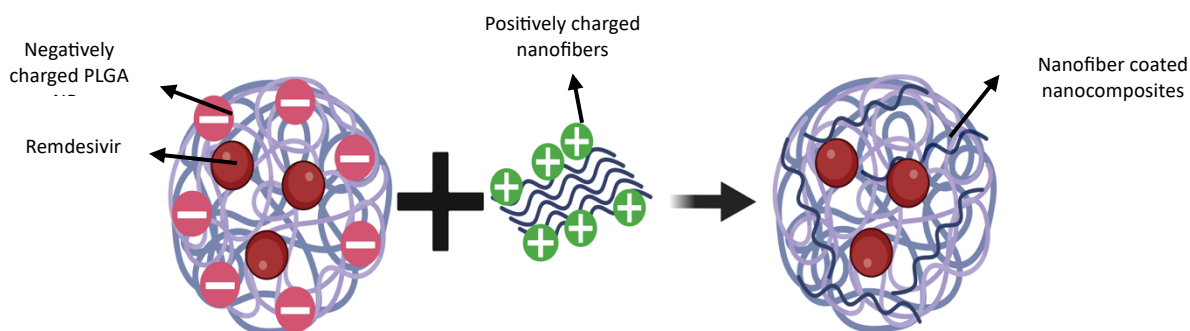

**Figure S2.** Schematic of nanocomposites. Positively charged nanofibers electrostatically interact with negatively charged PLGA NPs loaded with Remdesivir forming nanocomposites with enhanced cell penetrating abilities and drug delivery.

**Table S1. Characterization of Nanocomposites**

| Particle group | Size (nm)   | Zeta Potential (mV) | Polydispersity index (PDI) |
|----------------|-------------|---------------------|----------------------------|
| Blank PLGA     | 150 ± 40    | -23 ± 2             | 0.15                       |
| RDV NPs        | 210.47 ± 70 | -26.3 ± 1           | 0.212                      |
| RDV NCs        | 230 ± 77    | 31.09 ± 1           | 0.223                      |

**Table S2. Remdesivir (RDV) release kinetics during wash steps**

| Test study/Group                       | 1 <sup>st</sup> Wash (Indirect method) | 2 <sup>nd</sup> Wash (Indirect method) | 3 <sup>rd</sup> Wash (Indirect method) | 4 <sup>th</sup> Wash (Indirect method) | 5 <sup>th</sup> Wash (Indirect method) | Total drug lost (ug) in 4 mg NPs | Total drug loaded inside NPs |
|----------------------------------------|----------------------------------------|----------------------------------------|----------------------------------------|----------------------------------------|----------------------------------------|----------------------------------|------------------------------|
| Remdesivir drug lost (Indirect method) | 28 ug                                  | 7 ug                                   | 4 ug                                   | 6 ug                                   | 3 ug                                   | 48 ug                            | 272 ug                       |
| Pellet (Direct method)                 | 220 ug                                 |                                        |                                        |                                        |                                        |                                  |                              |

**Table S3. Primer sequences used to study nanocomposite immune responses**

| Primer | Forward 5'-3'                 | Reverse 5'-3'                 |
|--------|-------------------------------|-------------------------------|
| hIL-1β | CCT CCA GGG ACA GGA TAT GG    | ACA CGC AGG GGT ACA GA        |
| hIL-6  | TAG CCT CAA TGA CGA CCTA AG   | GTG GGG CTG ATT GGA AAC CT    |
| hTNF-α | CTC TTC TGC CTG CTG CAC TTT G | ATG GGC TAC AGG CTT GTC ACTC  |
| hIL-10 | TCT CCG AGA TGC CTT CAG CAG A | TCA GAC AAG GCT TGG CAA CCC A |

**Preparation of Nanofibers:** The peptides for this study were synthesized using standard solid-phase peptide synthesis. After synthesis, the crude peptide underwent purification using High-Performance Liquid Chromatography (HPLC) and mass was confirmed using Matrix-Assisted Laser Desorption/Ionization (MALDI) as shown in FigureS1. The peptide's chemical design

(Sequence: K10(QW)6E3) involves a core with alternating hydrophilic (Q: glutamine) and hydrophobic (W: tryptophan) sequence, leading to the formation of sandwich-. In this structure, the hydrophobic side faces the assembly's core, while the hydrophilic side faces the solvents. The presence of a flexible cationic domain (K: lysine) ensures effective interaction with cell membranes. Glutamic acids are added to the C-terminus to promote self-assembly equilibrium in the presence of the long cationic domain. Transmission Electron Microscopy (TEM) was used to characterize nanofiber formation, revealing higher-order assemblies (figure 2a). The excess positive charge along the long fiber axis grants these nanofibers exceptional cell-penetrating activity.
